# Supplementary material for: Conflict, Chaos, and the Art of Institutional Design
Source: Atypon-hosted journal article supplement (doi:10.1287/orsc.2023.1662), 2023-03-28
Supplement: orsc.2023.1662.sm1.pdf [file orsc.2023.1662.sm1.pdf]

# Conflict, Chaos, and the Art of Institutional Design – Online

## Supplement

Scott C. Ganz

Georgetown University McDonough School of Business and AEI

January 30, 2023

### Supplemental Figures

Figure 1: Variogram for the NK landscape

(a) Variogram for  $K = 0$

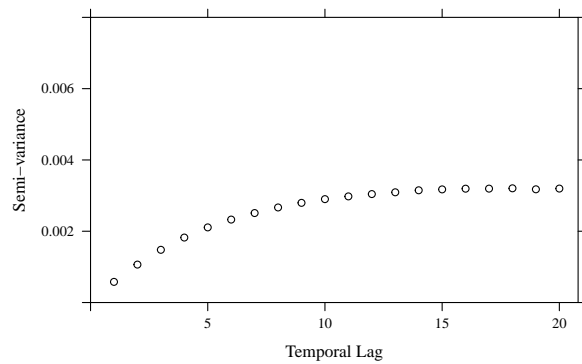

(b) Variogram for  $K = 5$

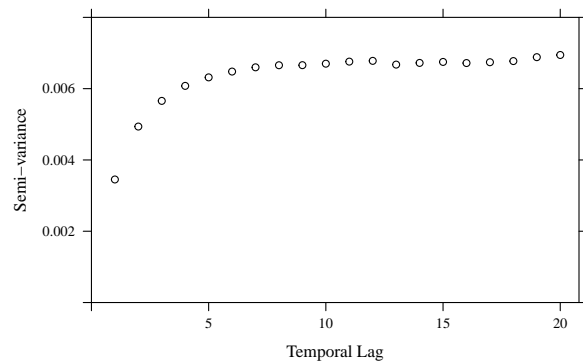

Note: The figure depicts variograms for an NK landscape where  $N = 12$  and  $K = 0$  (on the left) or  $K = 5$  (on the right).

Figure 2: Variogram for Political Location

(a) Variogram for  $x$ -coordinate Value

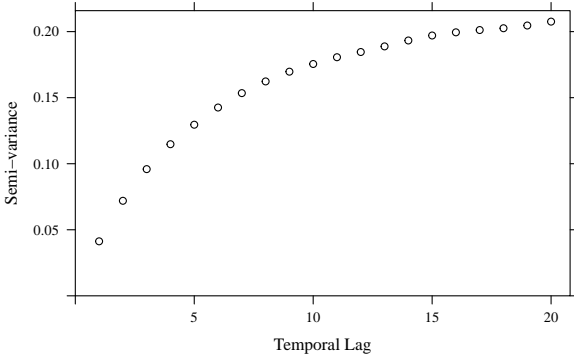

(b) Variogram for Distance from Origin

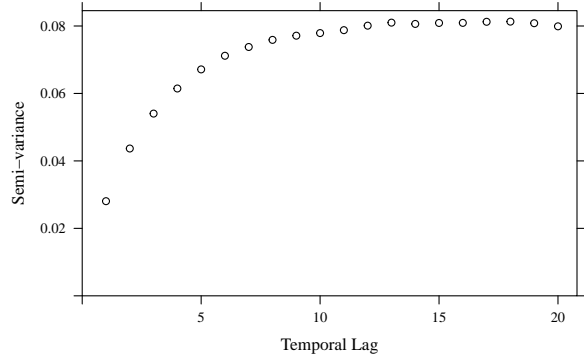

Note: The figure depicts variograms for the mapping from strategies to the  $x$ -coordinate in the political space after transforming  $g(\mathbf{x})$  to Cartesian coordinates (on the left) and distance from the origin (on the right).

Figure 3: Variogram for Executive Utility  $f_0$

(a)  $K = 0$

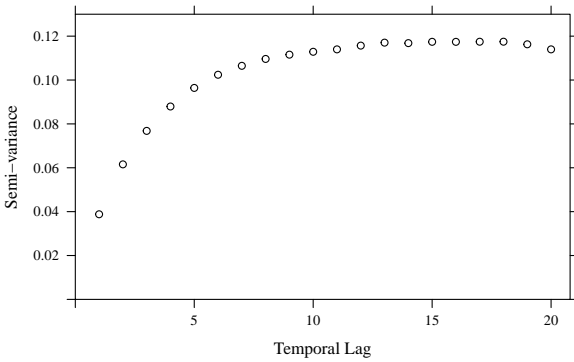

(b)  $K = 5$

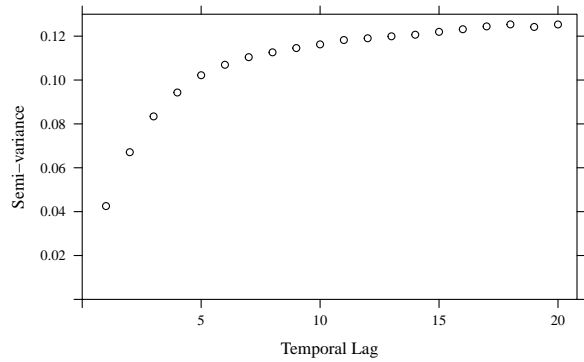

Note: The figure depicts variograms for the mapping from strategies to utility for the executive for  $N = 12$  and  $K = 0$  (on the left) and  $N = 12$  and  $K = 5$  (on the right).

## Conversion from $\bar{g}(\mathbf{x})$ to $g(\mathbf{x})$

The following is an abbreviated version of the geometric proof in (Gonzalez and Woods, 1992, pp. 229-233). Figure 4 reproduces the 2-simplex from ???.  $W$  represents a neutral outcome, i.e.,  $\bar{g}(\mathbf{x}) = (\frac{1}{3}, \frac{1}{3}, \frac{1}{3})$ .  $R = \{1, 0, 0\}$  and  $R_0 = \{0, \frac{1}{2}, \frac{1}{2}\}$  with  $B, G, B_0$ , and  $G_0$  analogously defined.

Assume, without loss of generality  $\bar{g}(\mathbf{x})$  falls in the triangle  $RGR_0$ .  $\theta$  is computed using the cosine formula:

$$\theta = \cos^{-1} \left[ \frac{(\bar{g}(\mathbf{x}) - W) \cdot (R - W)}{\|\bar{g}(\mathbf{x}) - W\| \|R - W\|} \right]$$

To compute  $r$ , assume without loss of generality that  $\bar{g}(\mathbf{x})$  falls in the triangle  $RWG$ . Begin by relabeling the coordinate system on the 2-simplex from barycentric to Cartesian coordinates, with  $W$  at the origin,  $R$  at  $(-\frac{1}{2}, -\frac{1}{3})$ ,  $G$  at  $(\frac{1}{2}, -\frac{1}{3})$ ,  $B$  at  $(0, \frac{2}{3})$ , and the other points analogously defined. Note that the triangle  $W, B_0, \bar{g}_0(\mathbf{x})$  is similar to the triangle  $W, B', \bar{g}(\mathbf{x})$  with  $B' = (0, \bar{B} - \frac{1}{3})$ . Noting first that  $|WB_0| = \frac{1}{3}$  and  $|B_0B'| = \bar{B}$ ,  $\frac{|W\bar{g}(\mathbf{x})|}{|W\bar{g}_0(\mathbf{x})|} = \frac{|WB'|}{|WB_0|} = 1 - 3\bar{B}$ . By the same logic, for  $\bar{g}(\mathbf{x})$  in the triangle  $RWB$ ,  $r = 1 - 3\bar{G}$  and for  $\bar{g}(\mathbf{x})$  in the triangle  $BWG$ ,  $r = 1 - 3\bar{R}$ .

Figure 4

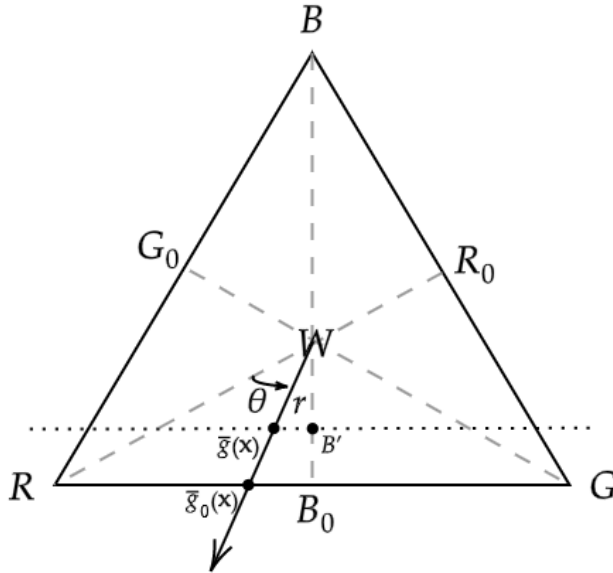

## Example of Ruggedness when $K = 0$

Let  $K = 0$  and assume that all decisions equal to 1 have quality values of 1 ( $c_i(1) = 1, \forall i$ ), and all decisions equal to 0 have quality values of 0 ( $c_i(0) = 0, \forall i$ ). The strategy that maximizes  $f_0$  is  $\mathbf{x}^* = 111111111111$ , because  $f_0(\mathbf{x}^*) = v(\mathbf{x}^*) - \delta_f(\mathbf{x}^*)^2 = 1 - 0 = 1$ . Assume the organization faces a status quo  $\mathbf{x}_0 = 000100010001$  and, for the purposes of simplicity:

$$\begin{aligned}
 (R_i^0, G_i^0, B_i^0) &= (0, 0, 0), \quad \forall i \\
 (R_1^1, G_1^1, B_1^1) &= (8, 0, 0) \\
 (R_2^1, G_2^1, B_2^1) &= (4, 0, 0) \\
 (R_3^1, G_3^1, B_3^1) &= (2, 0, 0) \\
 (R_4^1, G_4^1, B_4^1) &= (1, 0, 0) \\
 (R_5^1, G_5^1, B_5^1) &= (0, 8, 0) \\
 (R_6^1, G_6^1, B_6^1) &= (0, 4, 0) \\
 (R_7^1, G_7^1, B_7^1) &= (0, 2, 0) \\
 (R_8^1, G_8^1, B_8^1) &= (0, 1, 0) \\
 (R_9^1, G_9^1, B_9^1) &= (0, 0, 8) \\
 (R_{10}^1, G_{10}^1, B_{10}^1) &= (0, 0, 4) \\
 (R_{11}^1, G_{11}^1, B_{11}^1) &= (0, 0, 2) \\
 (R_{12}^1, G_{12}^1, B_{12}^1) &= (0, 0, 1)
 \end{aligned}$$

Thus,  $f_0 = \frac{1}{4}$ , because  $\mathbf{x}_0$  maps to the origin and  $v(\mathbf{x}_0) = \sum_i v(x_i)/12 = \frac{1}{4}$ . Changing an decision from 0 to 1 will increase the quality value of the strategy by  $\frac{1}{12}$  and changing an decision from 1 to 0 will decrease the quality value by  $\frac{1}{12}$ . If the organization selects an alternative that replaces a 1 with a 0, then the radial coordinate  $r$  will increase from 0 to 1 and, as a result, the new strategy will have a political outcome that is distance 1 from the origin. Thus, this alternative will be worse for the executive according to both the common-interest and politically-contested criteria. If instead the organization adopts an alternative that replaces a 0 with a 1, the quality value would increase. But, the new outcome would fall at least  $\frac{2}{5}$  away from the origin in political space.<sup>1</sup> Thus, the utility for  $z_0$  from the alternative would be less than the utility from the status quo. This example thus shows how the interdependence between the NK landscape and the dimensions of political space leads the organization to retain  $\mathbf{x}_0$  even though it is not the global maximum.

---

<sup>1</sup>The smallest change in the political space would result from changing  $x_3, x_7, \text{ or } x_{11}$  to a 1. The new radial coordinate  $r$  would be  $1 - \frac{3}{5} = \frac{2}{5}$ .

Figure 5: Supplementary Analyses

| Does moderate-conflict committee outperform dictatorship in short-term?       | If so, until what period? | Does moderate-conflict committee outperform dictatorship in long-term? | If so, beginning in what period? | If so, by how much does $f_0$ with moderate-conflict committee exceed $f_0$ with dictatorship at $t = 100$ ? | Is performance non-monotonic in the extent of conflict at $t = 100$ ? |
|-------------------------------------------------------------------------------|---------------------------|------------------------------------------------------------------------|----------------------------------|--------------------------------------------------------------------------------------------------------------|-----------------------------------------------------------------------|
| Base Case: $N = 12$ , $K = 5$ , $d \in \{1/8, 1/4, 1/2\}$ , $p = 2/3$         |                           |                                                                        |                                  |                                                                                                              |                                                                       |
| Yes                                                                           | 4                         | Yes                                                                    | 20                               | 0.04                                                                                                         | Yes                                                                   |
| Quorum Requirement: 2 decision makers must be present to adopt an alternative |                           |                                                                        |                                  |                                                                                                              |                                                                       |
| No                                                                            |                           | Yes                                                                    | 30                               | < 0.01                                                                                                       | No                                                                    |
| Voting Rule: Decisions are made by majority rule                              |                           |                                                                        |                                  |                                                                                                              |                                                                       |
| No                                                                            |                           | Yes                                                                    | 33                               | 0.03                                                                                                         | Yes                                                                   |
| Committee Size: Two decision maker committee                                  |                           |                                                                        |                                  |                                                                                                              |                                                                       |
| No                                                                            |                           | Yes                                                                    | 31                               | 0.03                                                                                                         | Yes                                                                   |
| Committee Size: Four decision maker committee                                 |                           |                                                                        |                                  |                                                                                                              |                                                                       |
| Yes                                                                           | 4                         | Yes                                                                    | 20                               | 0.04                                                                                                         | Yes                                                                   |
| Agenda-setting: Restricted to most-preferred local alternatives               |                           |                                                                        |                                  |                                                                                                              |                                                                       |
| No                                                                            |                           | No                                                                     |                                  |                                                                                                              |                                                                       |
| Risk preferences: Linear spatial loss function                                |                           |                                                                        |                                  |                                                                                                              |                                                                       |
| Yes                                                                           | 2                         | No                                                                     |                                  |                                                                                                              |                                                                       |
| Risk preferences: Cubic spatial loss function                                 |                           |                                                                        |                                  |                                                                                                              |                                                                       |
| Yes                                                                           | 5                         | Yes                                                                    | 15                               | 0.04                                                                                                         | Yes                                                                   |

## References

Gonzalez, Rafael C. and Richard E. Woods, *Digital Image Processing*, Reading, Mass: Addison-Wesley, 1992.
